# Supplementary material
Source: PubMed Central journal article supplement (PMC3147118)

Supplementary figure S1.

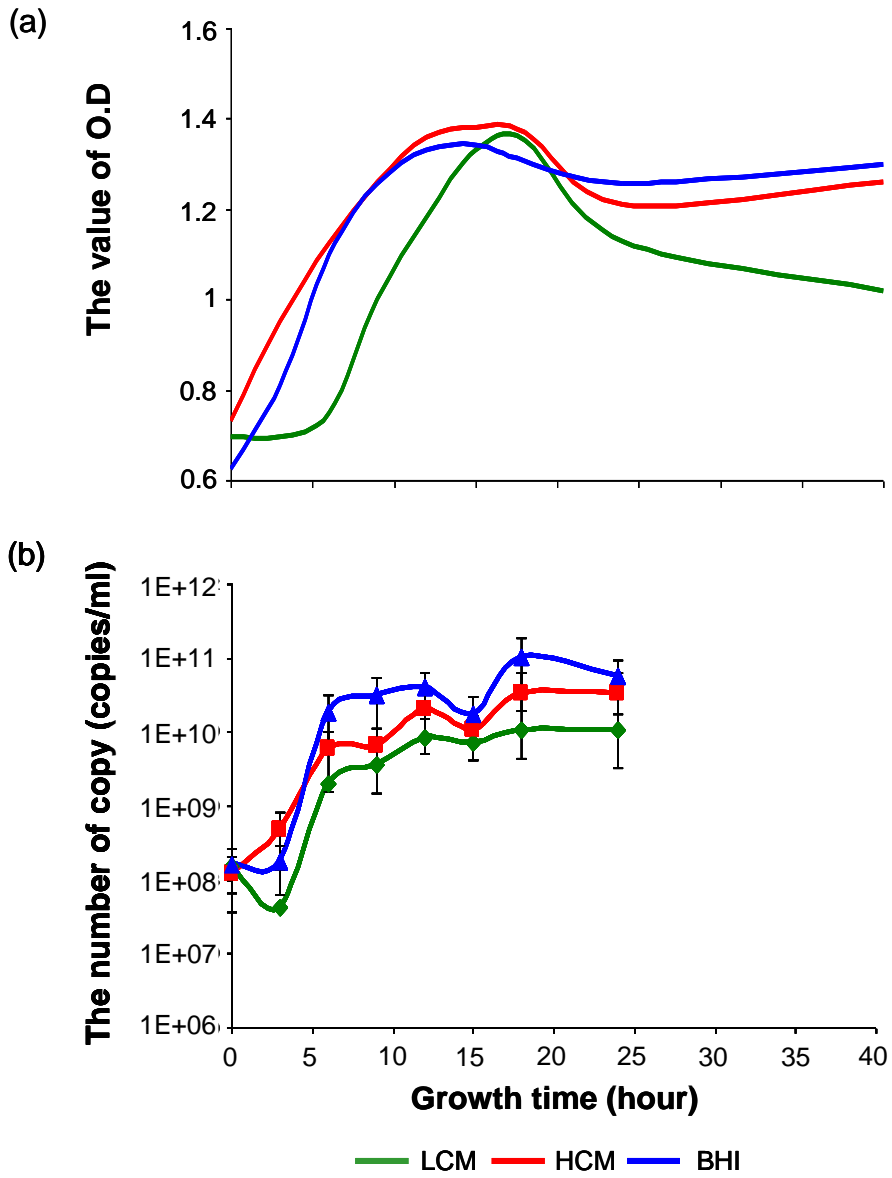

Supplement: 838040.f1.pdf [file 838040.f1.pdf]
